# Supplementary material for: Maytenus octogona Superoxide Scavenging and Anti-Inflammatory Caspase-1 Inhibition Study Using Cyclic Voltammetry and Computational Docking Techniques
Source: MDPI journal article supplement (doi:10.3390/ijms241310750), 2023-06-28
Supplement: s1 [file s1]

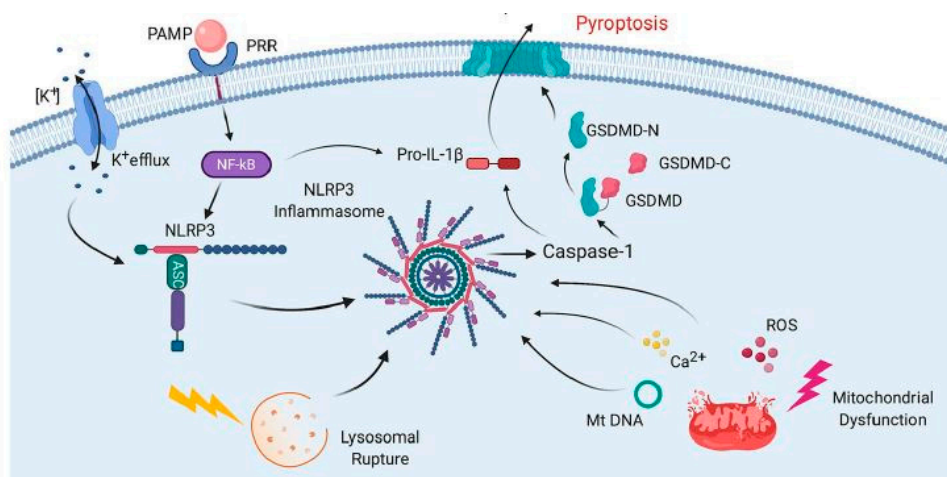

**Figure S1.** Mechanisms of inflammasome activation. The activation in general relies on two signals. First, a Pathogen-Associated Molecular Patterns (PAMP) binds to a pattern recognition receptors (PRR), resulting in synthesis of NLRP3 and pro-IL-1 $\beta$ . Then a second signal causes inflammasome assembly, leading to the activation of Caspase-1, and processing pro-IL-1 $\beta$  into IL-1 $\beta$  and pyroptosis. The second signal may come from a variety of pathways, including K<sup>+</sup> efflux, lysosomal rupture or mitochondrial dysfunction. This results in the release of ROS, Ca<sup>2+</sup> and mitochondrial DNA (mtDNA), all of which have been shown to activate the inflammasome. Pyroptosis occurs as a result of Caspase-1-mediated cleavage of GSDMD-D at the linker region of GSDMD-D. Following GSDMD-D cleavage, the amino terminus of GSDMD-D (GSDMD-D-N) forms a non-selective pore at the cell membrane through which IL-1 $\beta$  is then released. (From [6], with permission).

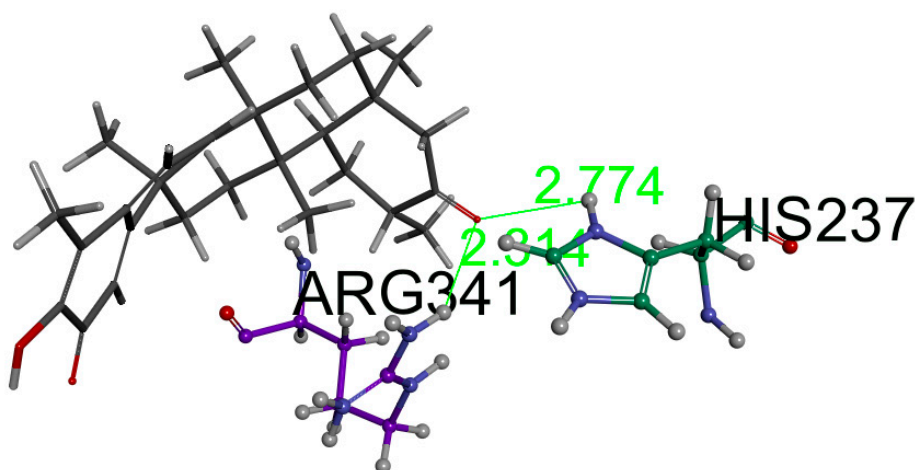

**Figure S2.** Atomic display of tingenone pose 1 related to Figure 5. The non methide-quinone carbonyl establishes H-bonds to the donor imidazole ring of His237 and the donor guanidino group of Arg341, 2.774 Å and 2.314 Å, respectively.

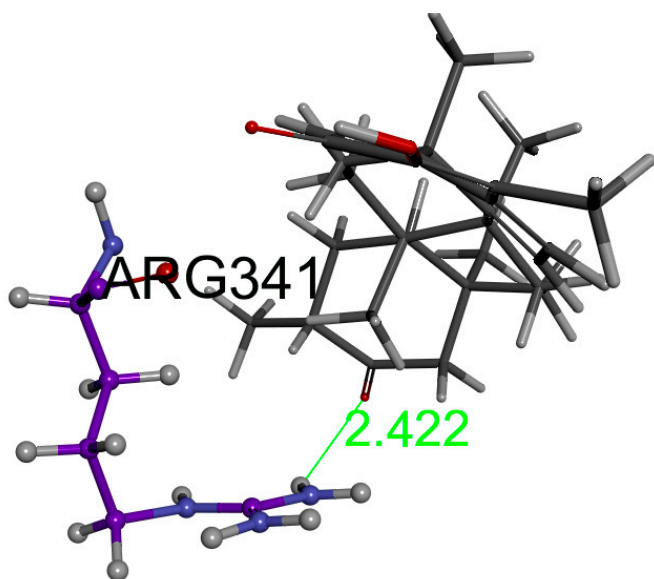

**Figure S3.** Atomic display of tingenone pose 5 related to Figure 7. The non methide-quinone carbonyl establishes a H-bond with the guanidino group of Arg341, 2.422Å.

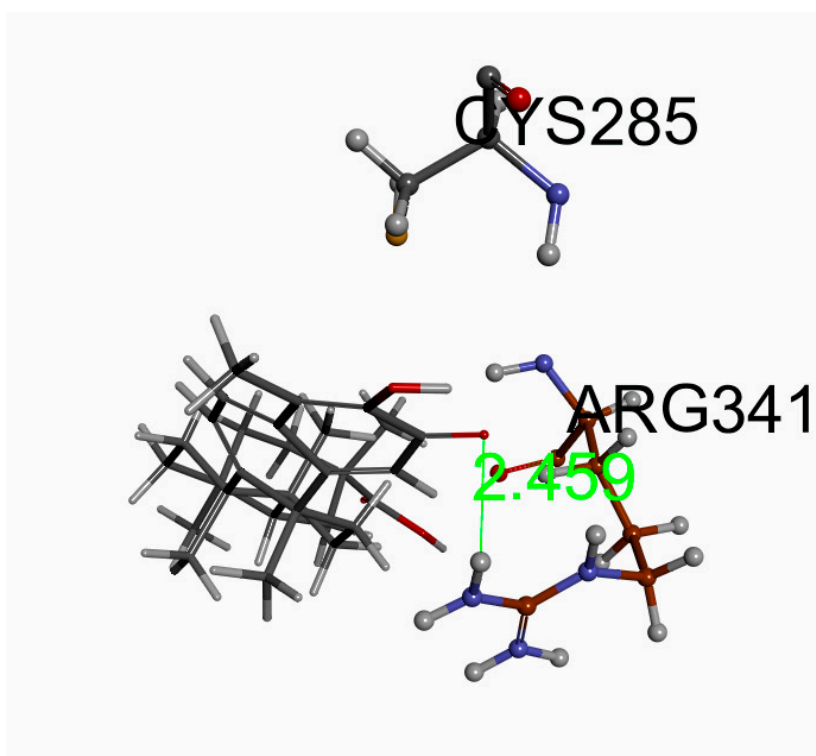

**Figure S4.** Atomic display of pristimerin docking pose 4 related to Figure 9. The non methide-quinone carbonyl establishes with donor guanidino a H-bond Arg341, 2.459 Å. Although Cys285 is close to pristimerin methide-quinone ring, a  $\pi$ -sulfur interaction is not obvious.
